# Supplementary material for: Probe-caught spontaneous and deliberate mind wandering in relation to self-reported inattentive, hyperactive and impulsive traits in adults
Source: PubMed Central journal article supplement (PMC5841345; doi:10.1038/s41598-018-22390-x), 2018-03-07
Supplement: 41598_2018_22390_MOESM1_ESM.pdf [file 41598_2018_22390_MOESM1_ESM.pdf]

Probe-caught spontaneous and deliberate mind wandering in relation to self-reported  
inattentive, hyperactive and impulsive traits in adults

Gizem Arabacı\* and Benjamin A. Parris

*Department of Psychology*

*Bournemouth University*

Address for correspondence:

Gizem Arabacı

Department of Psychology,

Bournemouth University

Talbot Campus

Fern Barrow

Poole

Dorset UK

BH12 5BB

01202 524111

garabaci@bournemouth.ac.uk

## Supplementary Material

Table 1

*Demographic information, CAARS t-scores and mind wandering scores for each participant*

| Participant number | Age | Occupation    | Gender | Previous diagnosis | CAARS scores |               |             |       | Standard SART probe responses |            |             | Sequential SART probe response |            |             |
|--------------------|-----|---------------|--------|--------------------|--------------|---------------|-------------|-------|-------------------------------|------------|-------------|--------------------------------|------------|-------------|
|                    |     |               |        |                    | Inattention  | Hyperactivity | Impulsivity | Index | OnTask                        | Deliberate | Spontaneous | OnTask                         | Deliberate | Spontaneous |
| 1                  | 22  | postgraduate  | female | no                 | 51           | 49            | 55          | 53    | 9                             | 11         | 0           | 11                             | 3          | 6           |
| 2                  | 21  | undergraduate | male   | no                 | 61           | 47            | 51          | 60    | 12                            | 8          | 0           | 7                              | 5          | 8           |
| 3                  | 19  | undergraduate | male   | yes                | 74           | 59            | 51          | 70    | 9                             | 1          | 10          | 6                              | 4          | 10          |
| 4                  | 19  | undergraduate | male   | no                 | 64           | 56            | 42          | 53    | 13                            | 1          | 6           | 17                             | 1          | 2           |
| 5                  | 20  | undergraduate | female | no                 | 63           | 57            | 46          | 73    | 19                            | 1          | 0           | 12                             | 1          | 7           |
| 6                  | 22  | undergraduate | male   | no                 | 70           | 59            | 58          | 68    | 4                             | 8          | 8           | 8                              | 5          | 7           |
| 7                  | 26  | postgraduate  | female | no                 | 45           | 40            | 43          | 47    | 18                            | 1          | 1           | 16                             | 3          | 1           |
| 8                  | 27  | postgraduate  | female | no                 | 63           | 54            | 61          | 61    | 9                             | 3          | 8           | 18                             | 0          | 2           |
| 9                  | 21  | undergraduate | male   | no                 | 57           | 59            | 48          | 53    | 3                             | 3          | 14          | 0                              | 2          | 18          |
| 10                 | 24  | postgraduate  | male   | no                 | 51           | 34            | 38          | 45    | 11                            | 4          | 5           | 7                              | 8          | 5           |
| 11                 | 36  | postgraduate  | male   | no                 | 59           | 47            | 52          | 48    | 10                            | 1          | 9           | 8                              | 3          | 9           |
| 12                 | 20  | undergraduate | male   | no                 | 57           | 51            | 79          | 61    | 14                            | 3          | 3           | 9                              | 7          | 4           |
| 13                 | 24  | postgraduate  | female | no                 | 47           | 53            | 48          | 45    | 6                             | 3          | 11          | 4                              | 2          | 14          |
| 14                 | 21  | undergraduate | female | no                 | 75           | 63            | 61          | 71    | 10                            | 1          | 9           | 10                             | 4          | 6           |
| 15                 | 18  | undergraduate | female | no                 | 60           | 72            | 61          | 65    | 5                             | 5          | 10          | 0                              | 7          | 13          |
| 16                 | 20  | undergraduate | male   | no                 | 80           | 74            | 77          | 90    | 5                             | 10         | 5           | 3                              | 8          | 9           |
| 17                 | 20  | undergraduate | female | no                 | 48           | 43            | 46          | 48    | 10                            | 3          | 7           | 10                             | 2          | 8           |
| 18                 | 20  | undergraduate | male   | no                 | 54           | 47            | 42          | 43    | 8                             | 6          | 6           | 2                              | 13         | 5           |
| 19                 | 18  | undergraduate | male   | no                 | 47           | 44            | 40          | 36    | 2                             | 17         | 1           | 3                              | 17         | 0           |

|      |    |               |        |    |    |    |    |    |    |    |    |    |    |    |
|------|----|---------------|--------|----|----|----|----|----|----|----|----|----|----|----|
| 20   | 28 | postgraduate  | male   | no | 51 | 43 | 43 | 57 | 17 | 2  | 1  | 19 | 1  | 0  |
| 21   | 26 | postgraduate  | female | no | 51 | 37 | 58 | 42 | 13 | 5  | 2  | 20 | 0  | 0  |
| 22   | 29 | postgraduate  | female | no | 37 | 43 | 46 | 40 | 13 | 2  | 5  | 9  | 4  | 7  |
| 23   | 29 | postgraduate  | female | no | 69 | 63 | 61 | 61 | 0  | 0  | 20 | 0  | 20 | 0  |
| 24   | 24 | postgraduate  | male   | no | 47 | 47 | 42 | 47 | 11 | 4  | 5  | 8  | 5  | 7  |
| 25   | 26 | postgraduate  | female | no | 48 | 40 | 43 | 53 | 18 | 2  | 0  | 10 | 2  | 8  |
| 26   | 26 | postgraduate  | male   | no | 44 | 38 | 42 | 43 | 9  | 11 | 0  | 18 | 2  | 0  |
| 27   | 19 | undergraduate | male   | no | 51 | 50 | 48 | 57 | 7  | 6  | 7  | 5  | 7  | 8  |
| 28   | 18 | undergraduate | male   | no | 54 | 56 | 45 | 50 | 6  | 4  | 10 | 2  | 11 | 7  |
| 29   | 18 | undergraduate | male   | no | 67 | 68 | 74 | 70 | 7  | 11 | 2  | 1  | 16 | 3  |
| 30   | 20 | undergraduate | male   | no | 61 | 38 | 45 | 60 | 8  | 4  | 8  | 8  | 7  | 5  |
| 31*  | 20 | undergraduate | male   | no | 61 | 44 | 55 | 55 | .  | .  | .  | .  | .  | .  |
| 32   | 21 | undergraduate | female | no | 57 | 49 | 52 | 53 | 14 | 1  | 5  | 6  | 7  | 7  |
| 33   | 34 | postgraduate  | female | no | 55 | 56 | 42 | 59 | 11 | 3  | 6  | 11 | 3  | 6  |
| 34   | 28 | postgraduate  | male   | no | 74 | 56 | 42 | 58 | 5  | 0  | 15 | 9  | 5  | 6  |
| 35   | 23 | postgraduate  | male   | no | 54 | 51 | 40 | 47 | 5  | 2  | 13 | 1  | 0  | 19 |
| 36   | 26 | postgraduate  | female | no | 54 | 49 | 38 | 45 | 9  | 5  | 6  | 4  | 7  | 9  |
| 37   | 28 | postgraduate  | male   | no | 67 | 50 | 58 | 58 | 11 | 0  | 9  | 8  | 6  | 6  |
| 38   | 26 | postgraduate  | female | no | 51 | 49 | 43 | 44 | 10 | 1  | 9  | 5  | 9  | 6  |
| 39   | 23 | postgraduate  | male   | no | 51 | 44 | 40 | 43 | 9  | 7  | 4  | 5  | 9  | 6  |
| 40** | 19 | undergraduate | female | no | 51 | 34 | 40 | 40 | 19 | 1  | 0  | .  | .  | .  |
| 41   | 26 | undergraduate | female | no | 61 | 50 | 58 | 60 | 7  | 4  | 9  | 10 | 5  | 5  |
| 42   | 22 | undergraduate | female | no | 64 | 62 | 51 | 62 | 7  | 5  | 8  | 13 | 2  | 5  |
| 43   | 25 | undergraduate | male   | no | 41 | 59 | 40 | 47 | 7  | 2  | 11 | 9  | 4  | 7  |
| 44   | 29 | undergraduate | female | no | 45 | 60 | 55 | 48 | 13 | 2  | 5  | 4  | 6  | 10 |
| 45   | 24 | undergraduate | male   | no | 54 | 50 | 48 | 60 | 7  | 8  | 5  | 5  | 7  | 8  |
| 46   | 35 | undergraduate | female | no | 45 | 41 | 55 | 48 | 11 | 0  | 9  | 16 | 2  | 2  |
| 47   | 28 | postgraduate  | male   | no | 47 | 53 | 55 | 52 | 11 | 5  | 4  | 7  | 2  | 11 |
| 48   | 27 | postgraduate  | female | no | 48 | 46 | 43 | 47 | 9  | 1  | 10 | 4  | 3  | 13 |
| 49   | 24 | postgraduate  | male   | no | 51 | 50 | 40 | 38 | 9  | 5  | 6  | 6  | 8  | 6  |
| 50   | 28 | postgraduate  | male   | no | 44 | 47 | 48 | 53 | 12 | 6  | 2  | 14 | 6  | 0  |
| 51   | 29 | postgraduate  | male   | no | 64 | 38 | 42 | 48 | 6  | 2  | 12 | 5  | 0  | 15 |

|    |    |               |        |            |    |    |    |    |    |    |    |    |    |    |
|----|----|---------------|--------|------------|----|----|----|----|----|----|----|----|----|----|
| 52 | 21 | undergraduate | male   | no         | 54 | 56 | 45 | 53 | 15 | 0  | 5  | 14 | 0  | 6  |
| 53 | 21 | undergraduate | male   | no         | 41 | 38 | 37 | 36 | 11 | 1  | 8  | 6  | 8  | 6  |
| 54 | 27 | postgraduate  | male   | no         | 57 | 50 | 55 | 58 | 5  | 5  | 10 | 4  | 6  | 10 |
| 55 | 21 | undergraduate | male   | no         | 39 | 53 | 64 | 57 | 14 | 1  | 5  | 0  | 18 | 2  |
| 56 | 26 | undergraduate | male   | no         | 44 | 41 | 42 | 48 | 11 | 0  | 9  | 14 | 0  | 6  |
| 57 | 23 | undergraduate | male   | no         | 44 | 50 | 48 | 43 | 16 | 1  | 3  | 12 | 0  | 8  |
| 58 | 25 | postgraduate  | male   | no         | 39 | 43 | 38 | 39 | 16 | 2  | 2  | 18 | 0  | 2  |
| 59 | 35 | other         | female | no         | 47 | 65 | 48 | 55 | 10 | 1  | 9  | 6  | 8  | 6  |
| 60 | 29 | undergraduate | male   | no         | 61 | 47 | 42 | 60 | 6  | 5  | 9  | 12 | 5  | 3  |
| 61 | 25 | postgraduate  | female | no         | 54 | 49 | 43 | 48 | 9  | 0  | 11 | 7  | 2  | 11 |
| 62 | 21 | undergraduate | male   | no         | 61 | 59 | 55 | 62 | 11 | 1  | 8  | 8  | 1  | 11 |
| 63 | 22 | undergraduate | male   | not stated | 74 | 74 | 67 | 77 | 4  | 0  | 16 | 1  | 0  | 19 |
| 64 | 25 | other         | male   | no         | 47 | 53 | 42 | 52 | 8  | 6  | 6  | 9  | 3  | 8  |
| 65 | 19 | undergraduate | male   | no         | 44 | 41 | 40 | 42 | 16 | 2  | 2  | 15 | 3  | 2  |
| 66 | 21 | undergraduate | male   | no         | 54 | 47 | 48 | 58 | 10 | 2  | 8  | 10 | 2  | 8  |
| 67 | 27 | postgraduate  | female | no         | 57 | 43 | 46 | 53 | 2  | 3  | 15 | 8  | 3  | 9  |
| 68 | 32 | postgraduate  | female | no         | 49 | 62 | 68 | 56 | 2  | 12 | 6  | 0  | 16 | 4  |
| 69 | 27 | postgraduate  | female | no         | 51 | 46 | 46 | 50 | 5  | 10 | 5  | 5  | 12 | 3  |
| 70 | 26 | postgraduate  | female | no         | 57 | 43 | 38 | 45 | 8  | 2  | 10 | 3  | 4  | 13 |
| 71 | 21 | undergraduate | male   | no         | 47 | 47 | 42 | 45 | 11 | 4  | 5  | 8  | 2  | 10 |
| 72 | 29 | postgraduate  | male   | no         | 51 | 50 | 42 | 53 | 12 | 0  | 8  | 8  | 4  | 8  |
| 73 | 27 | postgraduate  | female | no         | 57 | 46 | 52 | 57 | 4  | 3  | 13 | 2  | 9  | 9  |
| 74 | 25 | postgraduate  | male   | no         | 57 | 47 | 48 | 52 | 11 | 1  | 8  | 6  | 9  | 5  |
| 75 | 37 | postgraduate  | male   | no         | 56 | 54 | 58 | 63 | 14 | 1  | 5  | 19 | 0  | 1  |
| 76 | 22 | postgraduate  | male   | no         | 66 | 43 | 58 | 58 | 12 | 4  | 4  | 7  | 9  | 4  |
| 77 | 22 | undergraduate | male   | not stated | 57 | 49 | 43 | 57 | 14 | 3  | 3  | 13 | 4  | 3  |
| 78 | 27 | postgraduate  | female | no         | 48 | 49 | 49 | 45 | 9  | 8  | 3  | 1  | 11 | 8  |
| 79 | 27 | postgraduate  | male   | no         | 44 | 44 | 55 | 53 | 14 | 2  | 4  | 14 | 5  | 1  |
| 80 | 21 | undergraduate | male   | no         | 51 | 47 | 40 | 42 | 8  | 4  | 8  | 3  | 6  | 11 |

\* Mind wandering scores for participant 31 were removed.

\*\* Mind wandering scores for participant 40 were not recorded due to technical difficulties.
